# Supplementary material for: Phylogenomics of darkling beetles (Coleoptera: Tenebrionidae) from the Atacama Desert
Source: PeerJ. 2023 Feb 23;11:e14848. doi: 10.7717/peerj.14848 (PMC9968461; doi:10.7717/peerj.14848)
Supplement: Supplemental Information 1 [file peerj-11-14848-s001.xlsx]

## Sheet: Sheet1
	Number of sequences							Transcriptome size [bp]
Species	after assembly	after local VecScreen*	after cross-cont. screen	Cross-cont. [in %]	filtered out by NCBI	NCBI filter [in %]	published	after assembly	published	removed [bp]	removed [in %]
Achanius piceus	48329	48329	46957	0.0283888	5	0.00010648	46952	80260443	80255406	5037	6.27621e-05
Akis trilineata	53903	53903	53062	0.0156021	5	9.42294e-05	53057	75174369	75173018	1351	1.79719e-05
Allecula morio	52328	52328	52328	0	184	0.00351628	52144	70646767	70589023	57744	0.000818031
Alleculinae gen. n.	42135	42135	41690	0.0105613	1	2.39866e-05	41689	48130909	48130696	213	4.42545e-06
Alphasida marseuli	80644	80643	79657	0.0122267	0	0	79657	82242069	82241992	77	9.36261e-07
Alphitobius diaperinus	73493	73492	73492	0	16	0.000217711	73476	75912574	75900608	11966	0.000157654
Ammobius rufus	67513	67512	66838	0.00998341	8	0.000119692	66830	68638153	68635597	2556	3.72402e-05
Ammophorus cf. peruvianus	66828	66828	66160	0.00999581	1	1.51149e-05	66159	73743742	73743516	226	3.06468e-06
Antofagapraocis brevipilis	68227	68227	59585	0.126665	3	5.03482e-05	59582	58492296	58491386	910	1.55578e-05
Arthroconus sp.	39042	39042	38080	0.0246401	11	0.000288866	38069	34147820	34144510	3310	9.69409e-05
Aryenis unicolor	42567	42565	41601	0.0226477	14	0.00033653	41587	47562894	47559513	3381	7.10899e-05
Aspidolobus penai	32008	32007	31271	0.022995	175	0.00559624	31096	35282529	35221382	61147	0.00173608
Auladera rugicollis	71895	71894	63131	0.121888	1	1.58401e-05	63130	57354656	57354354	302	5.26551e-06
Blaps gibba	49910	49910	49303	0.0121619	2	4.05655e-05	49301	64578067	64577431	636	9.84864e-06
Blapstinus holosericeus	61786	61786	56705	0.0822355	0	0	56705	66244942	66244942	0	0
Bolitophagus reticulatus	46803	46803	46400	0.00861056	2	4.31034e-05	46398	69916314	69915834	480	6.8654e-06
Caenocrypticoides sp.	78691	78691	76636	0.0261148	31	0.00040451	76605	90301254	90289071	12183	0.000134933
Callyntra unicosta	61510	61510	53729	0.1265	8	0.000148895	53721	49983249	49981059	2190	4.38166e-05
Cis sp.	51964	51964	51908	0.00107767	15	0.000288973	51893	61816815	61812744	4071	6.58602e-05
Colydium elongatum	52211	52210	52072	0.00264317	2	3.84084e-05	52070	52813778	52812663	1115	2.11124e-05
Cordibates chilensis	37933	37933	36753	0.0311075	17	0.000462547	36736	47790697	47784820	5877	0.000122989
Corticeus unicolor	68580	68579	68418	0.00234766	1	1.4616e-05	68417	76987882	76987595	287	3.72787e-06
Cossyphus hoffmannseggi	72906	72905	72580	0.00445786	22	0.000303114	72558	71059550	71034020	25530	0.000359405
Crypticus quisquilius	66402	66400	66052	0.00524096	4	6.05583e-05	66048	71158824	71157509	1315	1.84801e-05
Cuphotes mercurius	34514	34513	33086	0.0413467	16	0.000483588	33070	37639429	37626906	12523	0.00033282
Diaperis boleti	46043	46043	45916	0.00275829	4	8.71156e-05	45912	53516098	53514884	1214	2.26853e-05
Diastoleus costalenis	40586	40586	40237	0.00859902	3	7.45582e-05	40234	47349325	47348525	800	1.6896e-05
Dichillus subcostatus	67439	67438	66740	0.0103502	2	2.9967e-05	66738	68149734	68149136	598	8.77487e-06
Discopleurus sp.	65571	65567	65337	0.00350786	45	0.000688737	65292	55616115	55598269	17846	0.000320981
Eledona agricola	44430	44428	43489	0.0211353	18	0.000413898	43471	59921248	59916250	4998	8.34164e-05
Entomochilus rugosus	55803	55803	48800	0.125495	7	0.000143443	48793	54409869	54406276	3593	6.60402e-05
Eremoecus sp.	43597	43597	42489	0.0254146	8	0.000188284	42481	50758715	50756212	2503	4.93142e-05
Erodius goryi obtusus	80667	80666	80235	0.00534302	2	2.49268e-05	80233	85820054	85819554	500	5.82618e-06
Eurychora sp.	39961	39961	39489	0.0118115	2	5.0647e-05	39487	38166826	38166294	532	1.3939e-05
Evaniosomus sp.	36738	36737	36388	0.00949996	29	0.000796966	36359	35068295	35060215	8080	0.000230461
Falsopraocis australis	82237	82237	79789	0.0297676	2	2.50661e-05	79787	87862783	87862089	694	7.89874e-06
Geoborus rugipennis	35176	34884	33294	0.0455796	0	0	33294	47403519	47403381	138	2.91118e-06
Gonopus sp.	39300	39300	38808	0.0125191	2	5.15358e-05	38806	42399818	42399394	424	1.00001e-05
Gyrasida camilae	52956	52956	51617	0.0252851	10	0.000193735	51607	56896747	56892453	4294	7.54757e-05
Gyriosomus curtisi	49476	49476	46846	0.0531571	1	2.13465e-05	46845	53920185	53919831	354	6.5653e-06
Heliofugus sp.	69238	69238	68929	0.00446287	0	0	68929	69105042	69104870	172	2.48897e-06
Heliotaurus ruficollis	51778	51778	49121	0.0513152	6	0.000122147	49115	50248395	50246837	1558	3.10069e-05
Hexagonochilus tuberculatus	60519	60519	59697	0.0135825	5	8.37563e-05	59692	64235757	64234295	1462	2.27604e-05
Hylithus cf. tentyroides	56051	56049	51991	0.0724009	0	0	51991	56738557	56738557	0	0
Imatismus sp.	34895	34891	33546	0.0385486	27	0.000804865	33519	26800732	26789754	10978	0.000409784
Isomira semiflava	49294	49281	47769	0.0306812	6	0.000125604	47763	56983749	56978398	5351	9.39128e-05
Lagria sp.	37953	37953	37922	0.0008168	17	0.000448289	37905	42643537	42638298	5239	0.000122871
Leptoderis collaris	48911	48910	47959	0.0194439	9	0.00018766	47950	71476404	71473732	2672	3.73844e-05
Melanimon tibiale	61105	61104	60457	0.0105885	6	9.92441e-05	60451	77554113	77551485	2628	3.38872e-05
Melaphorus elegans	38492	38492	38001	0.0127559	6	0.000157891	37995	30013825	30012304	1521	5.06792e-05
Meloe proscarabaeus	40482	40482	40458	0.000592856	1	2.4717e-05	40457	46718469	46718258	211	4.51644e-06
Melyris sp.	42076	42076	42054	0.000522863	6	0.000142674	42048	33277943	33275633	2310	6.94202e-05
Misolampus gibbulus	63571	63570	62787	0.0123171	0	0	62787	70890176	70890176	0	0
Mycetophagus quadripustulatus	60676	60676	60417	0.00426857	3	4.96549e-05	60414	74249810	74248939	871	1.17308e-05
Nalassus laevioctostriatus	57895	57895	57713	0.00314362	1	1.73271e-05	57712	58992443	58992182	261	4.42432e-06
Neoisocerus ferrugineus	50065	50064	43971	0.121704	5	0.000113711	43966	47042203	47040849	1354	2.87835e-05
Nestorinus sp.	41471	41470	39998	0.0354955	9	0.000225011	39989	46566840	46564647	2193	4.70958e-05
Nyctelia varipes	71345	71345	64446	0.0966991	10	0.000155169	64436	54543311	54540324	2987	5.47668e-05
Nycterinus atacamensis	70910	70910	63403	0.105867	0	0	63403	65920555	65916677	3878	5.88318e-05
Nyctopetus tenebrioides	49110	49110	48427	0.0139076	6	0.000123898	48421	64754689	64752550	2139	3.30334e-05
Omophlus lepturoides	77405	77404	76148	0.0162266	4	5.25293e-05	76144	105981684	105980533	1151	1.08605e-05
Onymacris rugatipennis	52283	52283	51234	0.0200639	0	0	51234	58772688	58772688	0	0
Oochrotus unicolor	54928	54926	54314	0.0111423	8	0.000147292	54306	57406056	57403761	2295	3.998e-05
Opatrum sabulosum	59093	59092	58674	0.00707372	2	3.40866e-05	58672	61141453	61141011	442	7.22919e-06
Pedinus sp.	64681	64680	61637	0.047047	3	4.86721e-05	61634	66730810	66730127	683	1.02353e-05
Phaleria gayi	63136	63136	62741	0.00625634	11	0.000175324	62730	69331442	69326529	4913	7.08675e-05
Philorea sp.	74792	74792	68267	0.087242	6	8.78902e-05	68261	71935292	71932961	2331	3.24052e-05
Physogaster sp.	55046	55046	51375	0.0666897	20	0.000389294	51355	61817959	61813011	4948	8.00479e-05
Pilobalia sp.	68174	68174	67368	0.0118227	6	8.90631e-05	67362	72559072	72557402	1670	2.30163e-05
Pimelia rugulosa	52688	52688	52311	0.00715533	1	1.91164e-05	52310	44910405	44910199	206	4.58693e-06
Platydema violacea	47890	47889	47557	0.0069327	1	2.10274e-05	47556	60677177	60676870	307	5.05959e-06
Praocis sp.	50307	50307	46490	0.0758741	4	8.604e-05	46486	54476547	54475275	1272	2.335e-05
Prionychus melanarius	57493	57492	57082	0.00713143	13	0.000227743	57069	65658181	65652214	5967	9.0888e-05
Psammetichus pilipes	35424	35424	34857	0.0160061	5	0.000143443	34852	40623084	40621932	1152	2.83591e-05
Psectrascelis confinis	80013	80013	79781	0.00289953	2	2.50686e-05	79779	89809273	89808607	666	7.41577e-06
Pyrochroa serraticornis	44740	44740	44693	0.00105051	1	2.23749e-05	44692	62089869	62087909	1960	3.15681e-05
Salax lacordairei	34650	34650	33596	0.0304185	2	5.95309e-05	33594	41859193	41858725	468	1.11805e-05
Scaurus uncinus	52510	52509	52102	0.00775105	6	0.000115159	52096	58067146	58065655	1491	2.56778e-05
Scotobius brevipes	49926	49925	44802	0.102614	2	4.46409e-05	44800	51144209	51143764	445	8.70096e-06
Sepidium bidentatum	60510	60509	59462	0.0173032	3	5.04524e-05	59459	60514416	60513473	943	1.55833e-05
Synchita undata	56788	56787	56666	0.00213077	10	0.000176473	56656	70451290	70446915	4375	6.21035e-05
Tentyria cf. laevigata	61582	61582	60983	0.00972687	1	1.6398e-05	60982	70938453	70938250	203	2.86164e-06
Thinobatis calderana	63336	62714	60688	0.0323054	4	6.59109e-05	60684	78135745	78134862	883	1.1301e-05
Trilobocara ciliata	40728	40726	38626	0.0515641	16	0.000414229	38610	42176023	42171374	4649	0.000110241
Valdivium sp.	59266	59266	59266	0	36	0.000607431	59230	51211455	51186322	25133	0.00049101
Vincenzellus ruficollis	61131	61130	60945	0.00302634	0	0	60945	86348670	86348670	0	0
Zophosis sp.	37313	37313	36764	0.0147134	0	0	36764	37862345	37862345	0	0
