# Supplementary material for: Phylogenomics of darkling beetles (Coleoptera: Tenebrionidae) from the Atacama Desert
Source: PeerJ. 2023 Feb 23;11:e14848. doi: 10.7717/peerj.14848 (PMC9968461; doi:10.7717/peerj.14848)
Supplement: Supplemental Information 2 — Neuropeptide precursors used in this study, including their completeness in the various taxa and the average evolutionary divergence across all sequence pairs in the 91 genera (including outgroup taxa). [file peerj-11-14848-s002.xlsx]

## Sheet: Sheet1
	Complete	Partial	Missing	Length	Average evolutionary
				[aa positions]	divergence and S.E.
Single-copy precursor
Adipokinetic hormone / corazonin-related peptide (ACP)	56	25	10	26-51	0.30 ±0.05
Adipokinetic hormone (AKH)	84	6	1	50-74	0.23 ±0.03
Agatoxin-like peptide (ALP)	90	1	0	94-101	0.08 ±0.02
Allatostatin C (AstC)	90	1	0	82-110	0.35 ±0.04
Allatostatin CC (AstCC)	76	13	2	55-138	0.14 ±0.02
Allatotropin (AT)	82	5	4	30-117	0.22 ±0.02
Bursicon alpha	44	39	8	30-140	0.10 ±0.01
Bursicon beta	53	31	7	37-136	0.16 ±0.02
Crustacean cardioactive peptide (CCAP)	72	13	6	70-149	0.24 ±0.03
CCHamide 1 (CCHa1)	70	17	4	26-160	0.37 ±0.03
CCHamide 2 (CCHa2)	85	5	1	86-116	0.19 ±0.02
CNMamide (CNMa)	62	25	4	49-139	0.54 ±0.04
Corticotropin-releasing factor-like Diuretic Hormone (CRF-DH)	80	10	1	78-161	0.12 ±0.01
Glycoprotein hormone alpha 2 (GPA2)	79	7	5	35-121	0.07 ±0.01
Glycoprotein hormone beta 5 (GPB5)	74	12	5	39-162	0.14 ±0.02
Inotocin	65	20	6	68-154	0.25 ±0.03
Insulin-related peptide 1 (IRP)	74	13	4	58-127	0.48 ±0.04
ITG-like (ITG)	88	3	0	160-214	0.06 ±0.01
Myosuppressin (MS)	88	3	0	51-114	0.36 ±0.04
Neuroparsin	83	8	0	74-112	0.40 ±0.04
Neuropeptide F1 (NPF 1)	86	2	3	45-92	0.21 ±0.03
Proctolin 1	89	2	0	77-99	0.27 ±0.03
RFLamide (RFLa)	63	21	7	60-187	0.38 ±0.03
SIFamide (SIFa)	86	4	1	57-77	0.26 ±0.04
short Neuropeptide F (sNPF)	89	1	1	89-102	0.12 ±0.02
Trissin	57	26	8	65-102	0.17 ±0.02
Multiple-copy precursor
CAPA	66	22	3	64-158	0.41 ±0.03
extended FMRFamide (FMRFa)	77	9	5	67-238	0.39 ±0.03
Myoinhibitory peptide (MIP)	89	2	0	146-203	0.24 ±0.02
NVP-like (NVP)	89	2	0	212-354	0.22 ±0.01
Periplaneta neuropeptide-like precursor (PNPLP)	78	13	0	38-695	0.26 ± 0.01
Pyrokinin (PK)	57	32	2	28-173	0.48 ±0.04
RYamide (RYa)	81	8	2	79-134	0.18 ±0.02
Sulfakinin (SK)	77	10	4	15-117	0.22 ±0.03
Tachykinin-related peptide (TKRP)	82	9	0	52-279	0.26 ±0.02
